# Supplementary material for: Intra-Abdominal Hypertension and Compartment Syndrome after Pediatric Liver Transplantation: Incidence, Risk Factors and Outcome
Source: MDPI journal article supplement (doi:10.3390/children9121993), 2022-12-18
Supplement: s1 [file s1]

## Supplement

### Standard immunosuppressive regime:

- All patients one dose prednisolone during transplantation (300mg/square meter body surface)
- All patients Basiliximab on day 0 and 4 after pLT
- All patients long-term treatment with tacrolimus only (modigraf® from day 1)
  - o except:
    - Patients with hepatoblastoma or below 6 kg bodyweight received Cyclosporine and Prednisolone as long term treatment
    - Patient with combined lung-liver transplant: Tacrolimus, Prednisolone and Mycophenolate Mofetil.

### Calculation of diuresis score:

**diuresis score** = hourly diuresis [ml/kg/h] / 1+ (furosemide[mg/kg/d] x 0.4 + etacrynic acid[mg/kg/d] x 0.1 + hydrochlorothiazide[mg/kg/d] x 0.04 + spironolactone[mg/kg/d] x 0.01 + mannitol[g/kg/d] x 0.13 + theophylline[mg/kg/d] x 0.01 + acetazolamide [mg/kg/d] x 0.005).

## Supplement Table S1

| Supplement Table 1: Graft and Transplant characteristics                      |                     |                      |                     |                     |
|-------------------------------------------------------------------------------|---------------------|----------------------|---------------------|---------------------|
|                                                                               | No IAH              | IAH                  | ACS                 | Total               |
| <b>Patients (n=)</b>                                                          | <b>4</b>            | <b>6</b>             | <b>17</b>           | <b>27</b>           |
| Type of LT: Living donor (LD) versus deceased donor                           | 75% LD              | 17% LD               | 18% LD              | 26%                 |
| Size of transplant: whole organ versus sized-reduced whole organ versus split | 1 : 0 : 3(75%)      | 4 : 0 : 2(33%)       | 4 : 2 : 11(65%)     | 9 : 2 : 16(59%)     |
| Weight of explanted liver (g) *                                               | 549.15<br>[+199.79] | 1064.90<br>[+565.30] | 743.61<br>[+765.70] | 787.84<br>[+670.28] |
| Weight of transplanted liver (g) *                                            | 457.35<br>[+405.66] | 758.95<br>[+504.08]  | 576<br>[+468.03]    | 593.41<br>[+460.74] |
| Graft to-Recipient Weight Ratio *                                             | 0.03<br>[+0.005]    | 0.02<br>[+0.007]     | 0.03<br>[+0.012]    | 0.03<br>[+0,01]     |
| Large for size transplantation                                                | 1 (25%)             | 0                    | 5 (29%)             | 6 (22%)             |
| Duration of cold ischemia (min)*                                              | 292.75<br>[+112.11] | 527.67<br>[+194.36]  | 554.06<br>[+185.12] | 509.48<br>[+195.97] |
| Type of abdominal wall closure: primary versus sequential/staged              | 1:3(75%)            | 4:2(33%)             | 2:15(88%)           | 7:20(74%)           |
| Aortic anastomosis of Arteria hepatica: yes versus no                         | 0:4(100%)           | 2:4(66%)             | 5:12(71%)           | 7:20(0.74)          |
| *Mean [+ standard deviation]                                                  |                     |                      |                     |                     |

Supplement Table S2

|                                         |            |               | NoIAH*                  |                                 |                 |                 | IAH *               |                                 |                 |                 | ACS*                |                                 |                 |                 |                              |
|-----------------------------------------|------------|---------------|-------------------------|---------------------------------|-----------------|-----------------|---------------------|---------------------------------|-----------------|-----------------|---------------------|---------------------------------|-----------------|-----------------|------------------------------|
| Parameter                               |            | Unit          | Median<br>[Min-<br>Max] | Mean<br>[Standard<br>deviation] | Lower<br>CI 95% | Upper<br>CI 95% | Median<br>[Min-Max] | Mean<br>[Standard<br>deviation] | Lower<br>CI 95% | Upper<br>CI 95% | Median<br>[Min-Max] | Mean<br>[Standard<br>deviation] | Lower<br>CI 95% | Upper<br>CI 95% | p-value<br>Kruskal<br>Wallis |
| Heart frequency                         |            | per<br>minute | 100 [85-<br>111]        | 99 [±11]                        | 82              | 116             | 99 [90-<br>128]     | 103[±15]                        | 88              | 117             | 110[83-<br>129]     | 110[±15]                        | 103             | 119             | 0.25                         |
| Mean arterial<br>pressure (MAP)         |            | mmHg          | 66[62-98]               | 73[±17]                         | 46              | 100             | 92[63-96]           | 81[±15]                         | 68              | 99              | 73[60-89]           | 76[±11]                         | 70              | 80              | 0.34                         |
| Near infrared<br>spectroscopy (NIRS)    |            | %             | 59 [56-64]              | 59 [±6]                         | 6.6             | 112.1           | 75[71-89]           | 79[±9]                          | 64.6            | 90.3            | 72[52-89]           | 72[±11]                         | 65.8            | 78.3            | 0.14                         |
| Dynamic Tissue Perfusion<br>Measurement | Liver      | cm/sec        | 0.42[0.12-<br>0.83]     | 0.445[±0.363]                   | -0.13           | 1.02            | 0.30[0.09-<br>0.45] | 0.310[±0.131]                   | 0.14            | 0.48            | 0.21[0.13-<br>2.05] | 0.434[±0.509]                   | 0.13            | 0.76            | 0.96                         |
|                                         | Kidney     | cm/sec        | 0.17[0.9-<br>0.42]      | 0.211[±0.145]                   | -0.02           | 0.44            | 0.15[0.07-<br>0.32] | 0.197[±0.126]                   | -0.01           | 0.35            | 0.27[0.1-<br>2.05]  | 0.394[±0.492]                   | 0.11            | 0.72            | 0.19                         |
|                                         | Spleen     | cm/sec        | 0.32[0.19-<br>0.57]     | 0.353[±0.181]                   | 0.07            | 0.64            | 0.42[0.26-<br>0.55] | 0.376[±0.156]                   | 0.18            | 0.65            | 0.46[0.04-<br>0.99] | 0.424[±0.304]                   | 0.23            | 0.61            | 0.96                         |
|                                         | Intestines | cm/sec        | 0.07[0.04-<br>0.36]     | 0.135[±0.151]                   | -0.11           | 0.38            | 0.05[0.03-<br>0.27] | 0.115[±0.138]                   | -0.08           | 0.29            | 0.10[0.01-<br>0.29] | 0.115[±0.076]                   | 0.07            | 0.17            | 0.73                         |
| Respiration frequency                   |            | per<br>minute | 28[26-31]               | 28[±2]                          | 25              | 32              | 20[16-34]           | 25[±8]                          | 16              | 32              | 24[14-46]           | 27[±8]                          | 23              | 31              | 0.39                         |
| D-GFR Score                             |            |               | 3.2[2.8-<br>3.5]        | 3.1[±0.3]                       | 2.7             | 3.7             | 2.4[1.0-<br>3.0]    | 2.1[±0.8]                       | 1.5             | 2.9             | 2.8[0.6-<br>5.2]    | 2.9[±1.2]                       | 2.3             | 3.5             | 0.10                         |
| Albumin blood level                     |            | g/dl          | 24[21-25]               | 23[±2]                          | 18              | 28.1            | 24[23-25]           | 24[±1]                          | 22.2            | 26              | 24[18-32]           | 25[±4]                          | 23              | 27.3            | 0.84                         |
| Albumin substitution                    |            | g             | 3[2-10]                 | 4.5[±3.7]                       | -1.4            | 10.4            | 0[0-12]             | 2.8[±5.2]                       | -2.7            | 7.4             | 0[0-18]             | 1.8[±4.4]                       | -0.4            | 4.2             | 0.07                         |
